# Supplementary material
Source: PubMed Central journal article supplement (PMC9718685)

Newborn  
Excitatory  
Neurons

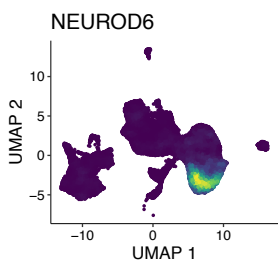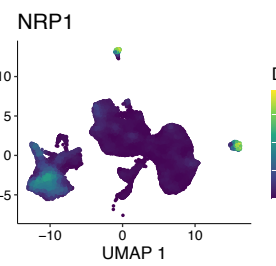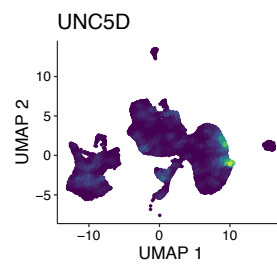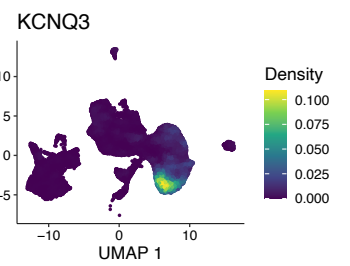

Inter-  
neurons

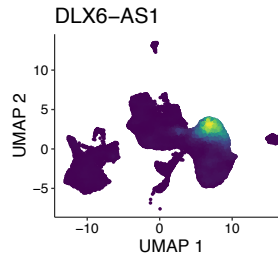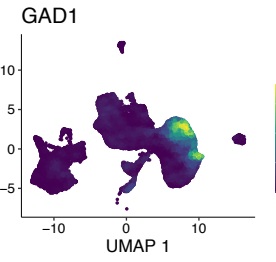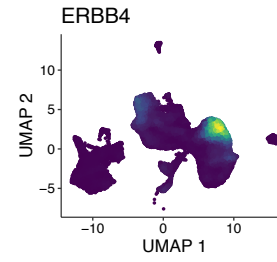

Deep layer  
Excitatory  
Neurons

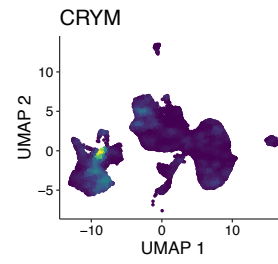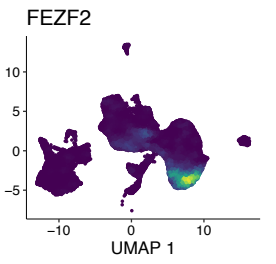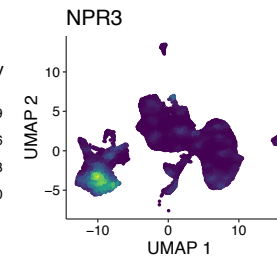

Choroid/  
Ependymal

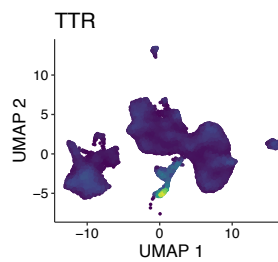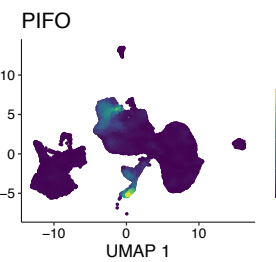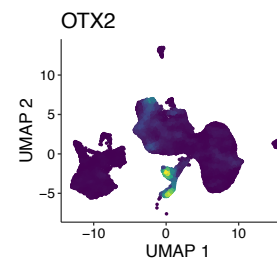

Maturing  
Excitatory  
Neurons

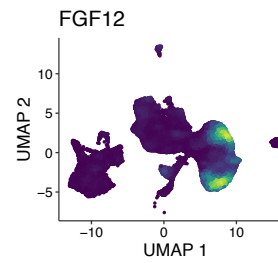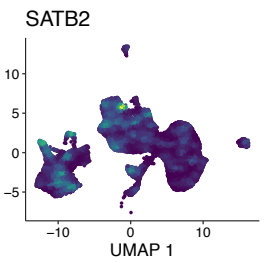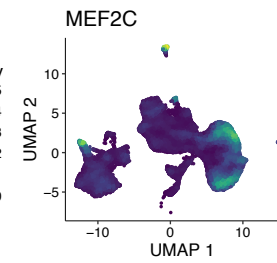

Early  
Radial  
Glia

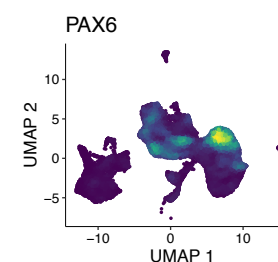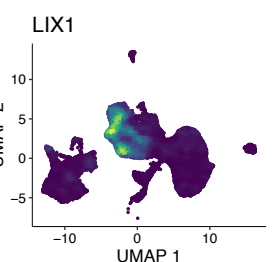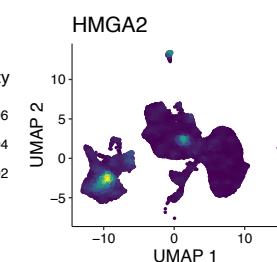

Radial  
Glia

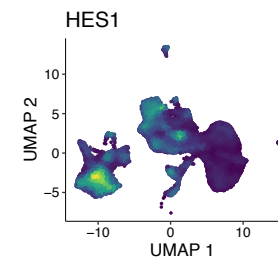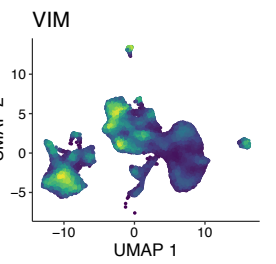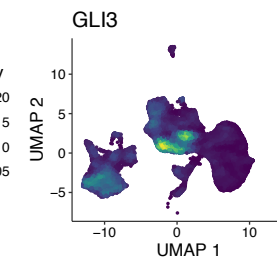

Microglia

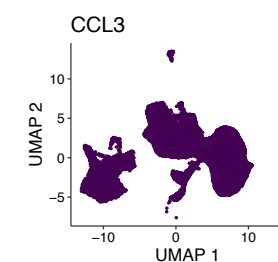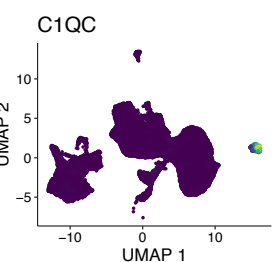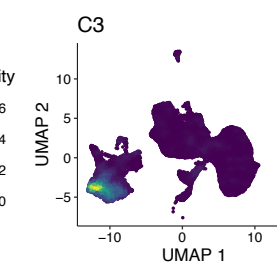

Mesenchyme

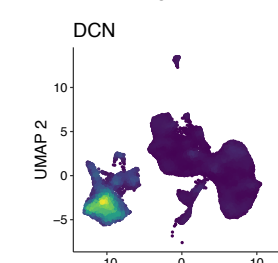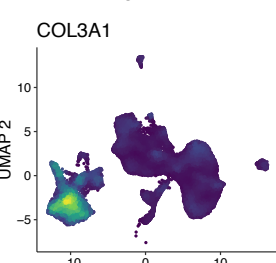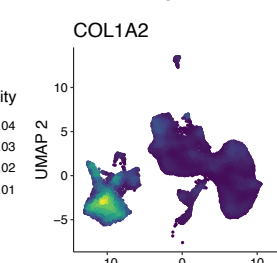

Glial Precursors

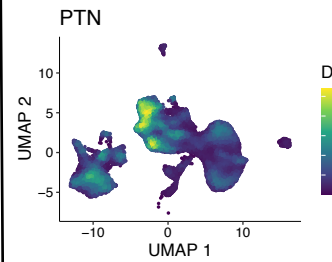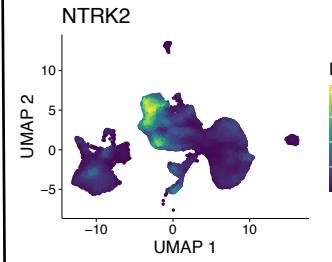

Pericyte/Mural

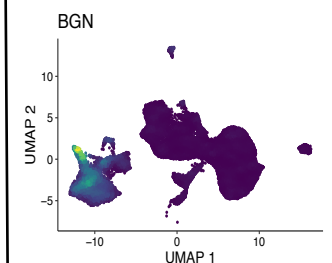

Glycolysis

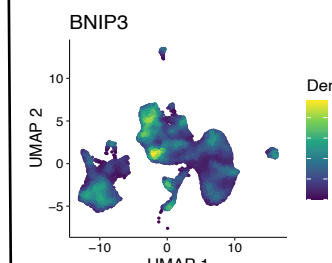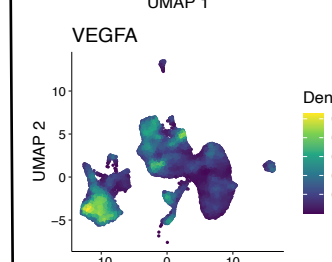

Supplement: 41380_2022_1786_MOESM6_ESM.pdf [file 41380_2022_1786_MOESM6_ESM.pdf]
