# Supplementary material
Source: PubMed Central journal article supplement (PMC9718685)

**a**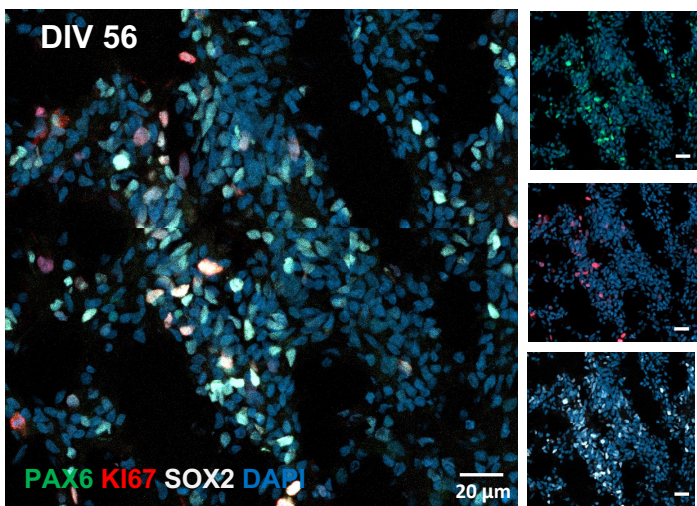**b**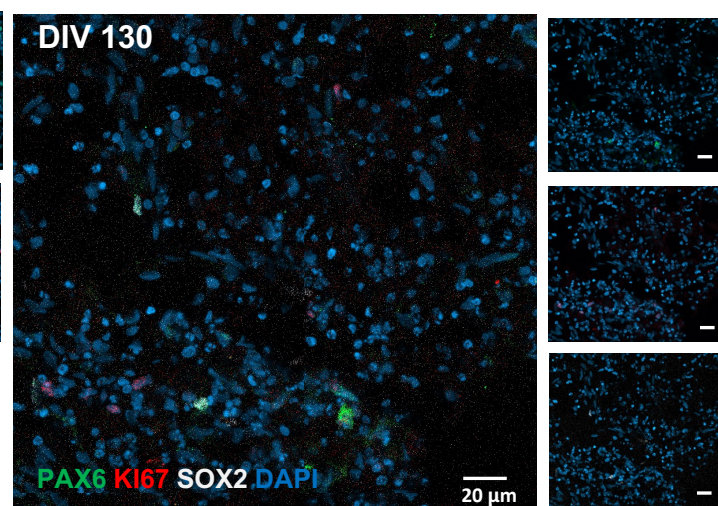**c**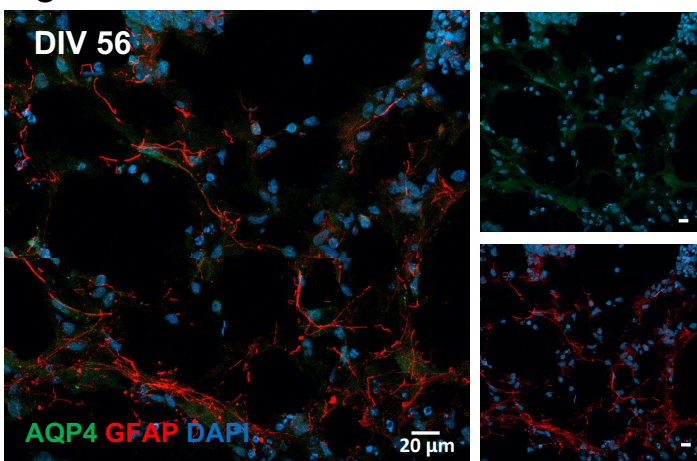**d**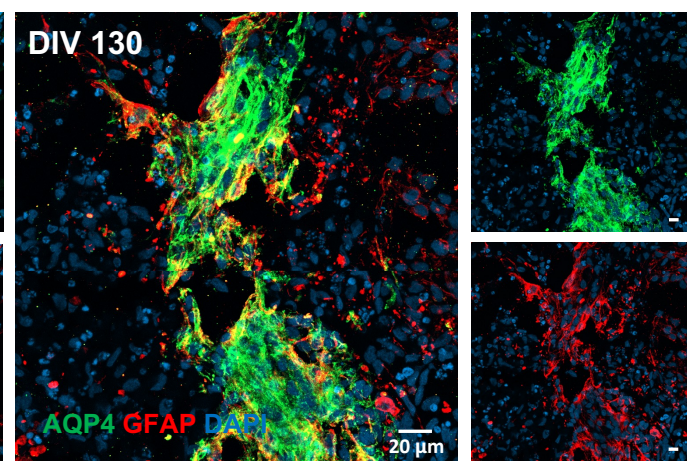**e****DIV 130**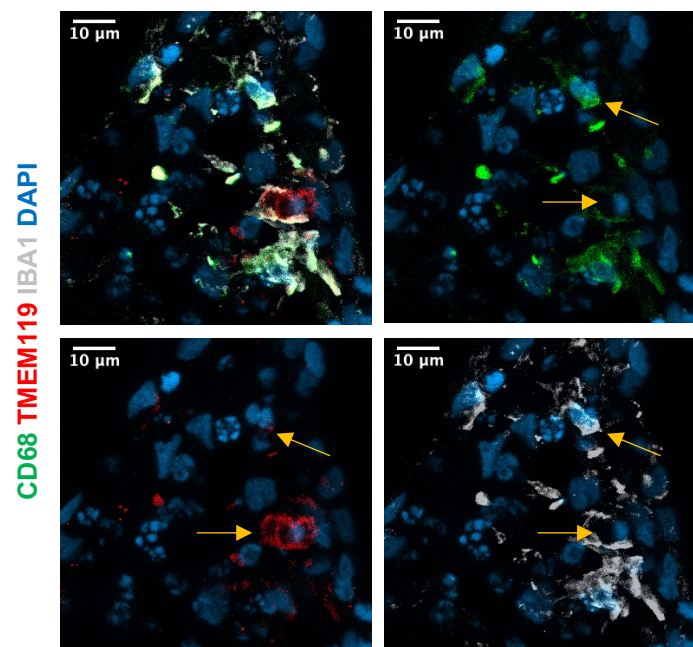**f****DIV 130**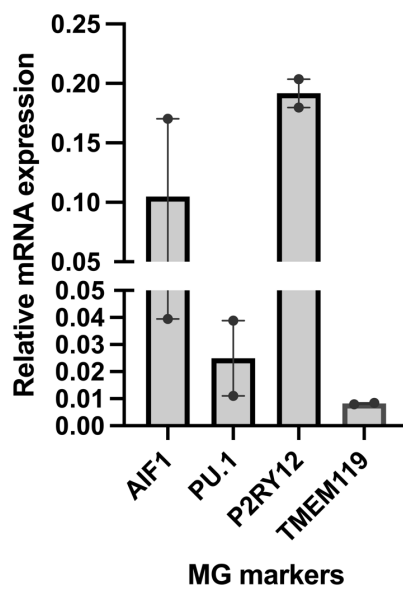

Supplement: 41380_2022_1786_MOESM2_ESM.pdf [file 41380_2022_1786_MOESM2_ESM.pdf]
