# Supplementary material
Source: PubMed Central journal article supplement (PMC9718685)

**a.**

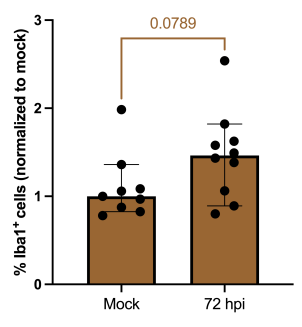

**b.**

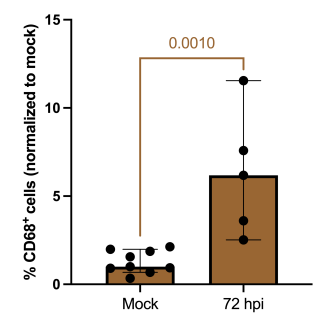

**c.**

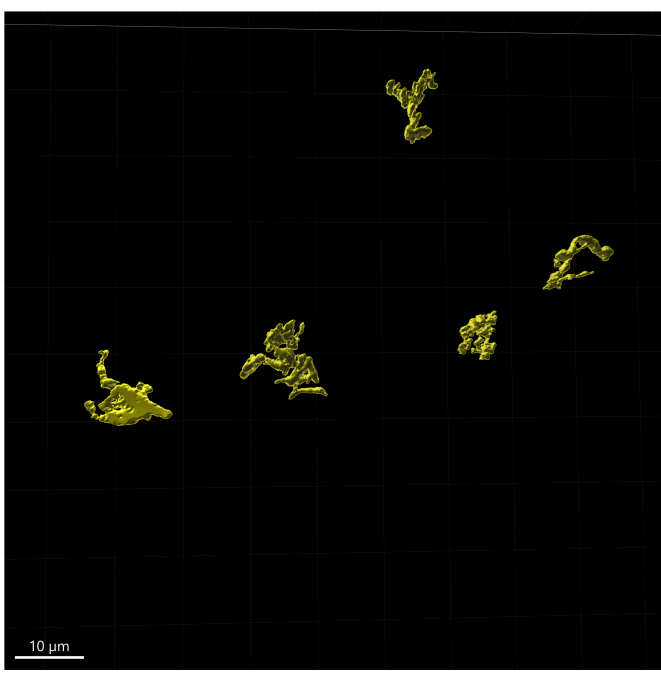

**d.**

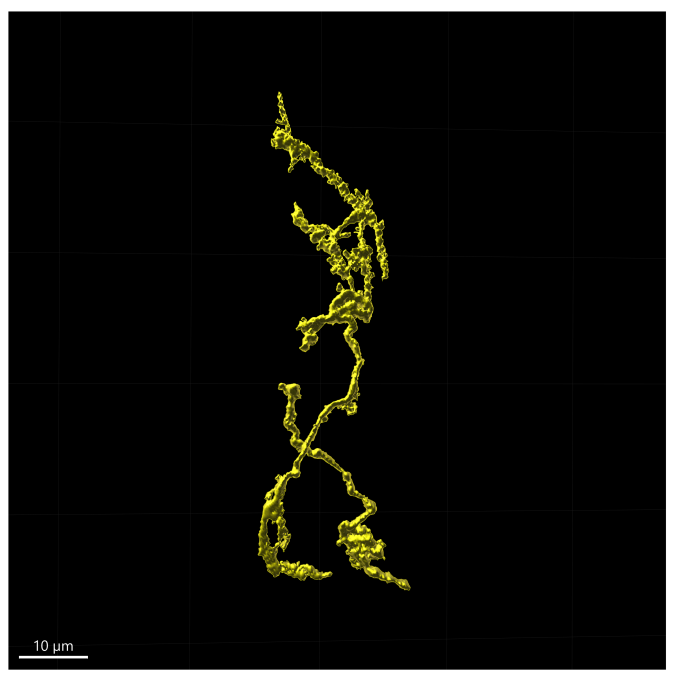

**e.**

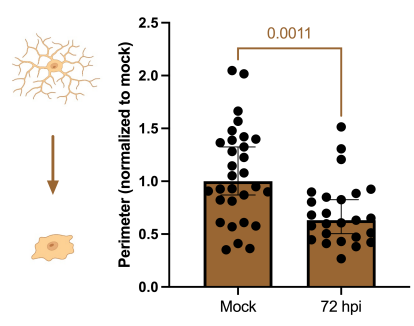

**f.**

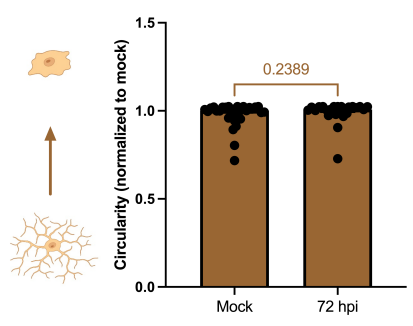

**g.**

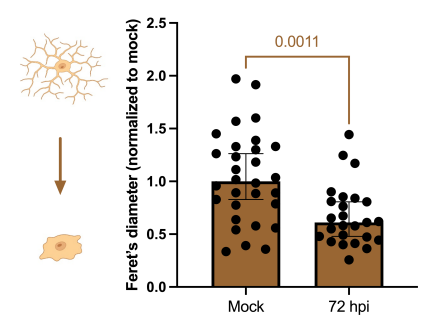

Supplement: 41380_2022_1786_MOESM4_ESM.pdf [file 41380_2022_1786_MOESM4_ESM.pdf]
