# Supplementary material
Source: PubMed Central journal article supplement (PMC9718685)

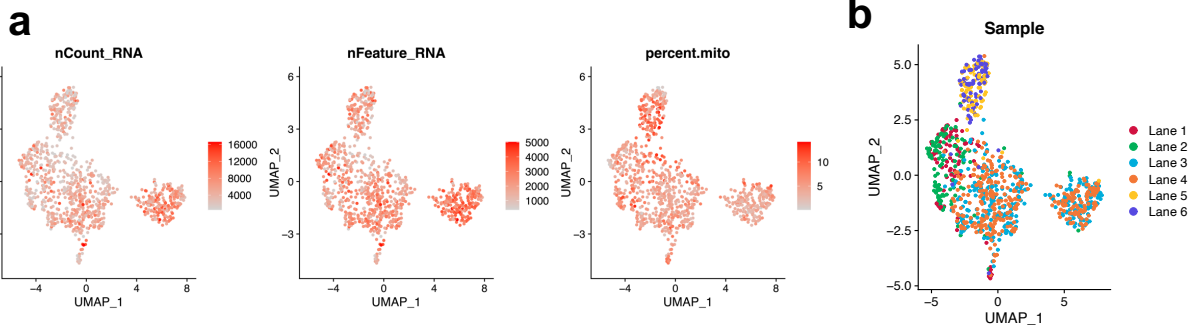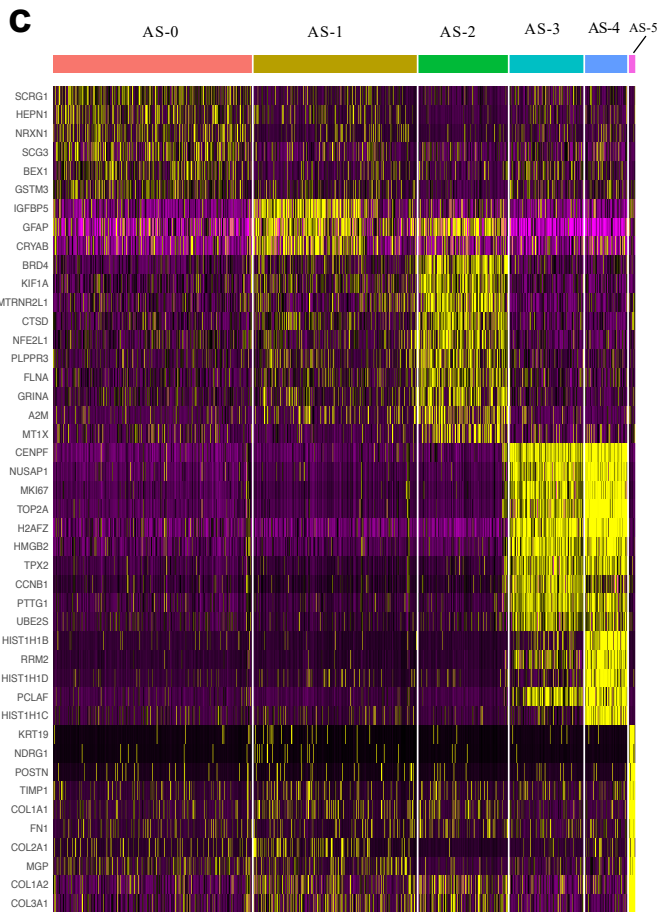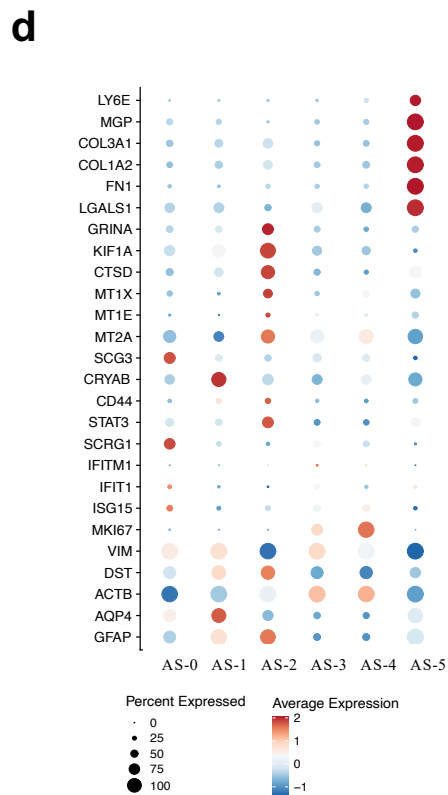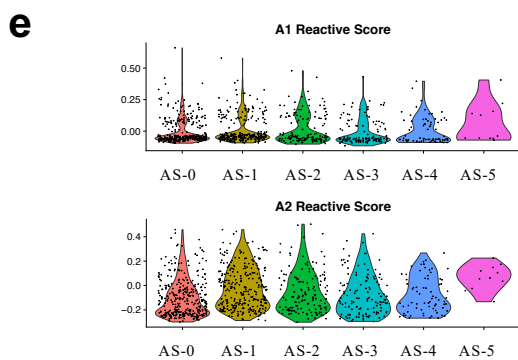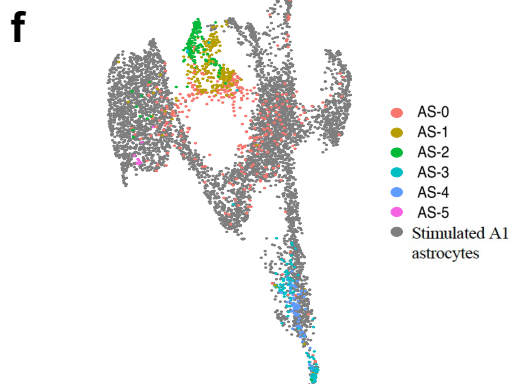

Supplement: 41380_2022_1786_MOESM9_ESM.pdf [file 41380_2022_1786_MOESM9_ESM.pdf]
